# Supplementary material for: A statistically rigorous multi-scale texture analysis framework for 3D spheroid characterization: temporal autocorrelation correction and molecular validation
Source: Sci Rep. 2026 May 9;16:21252. doi: 10.1038/s41598-026-51722-5 (PMC13347032; doi:10.1038/s41598-026-51722-5)
Supplement: Supplementary file 2 — Supplementary Material 2 [file 41598_2026_51722_MOESM2_ESM.xlsx]

## Sheet: EMT Markers
Gene Symbol	Gene Name	Marker Type	A549 Expression [log₂(TPM+1)]	H1299 Expression [log₂(TPM+1)]	Log₂ Fold-Change (H1299/A549)	Fold-Change (Linear)	Interpretation
VIM	Vimentin	Mesenchymal	9.53	10.99	1.46	2.75	H1299 gain (mesenchymal)
CDH1	E-cadherin	Epithelial	2.91	0.5	-2.41	0.19	H1299 loss (mesenchymal)
CDH2	N-cadherin	Mesenchymal	7.45	8.12	0.67	1.59	Similar
SNAI1	Snail	EMT-TF	3.21	2.89	-0.32	0.8	Similar
SNAI2	Slug	EMT-TF	2.15	3.45	1.3	2.46	H1299 upregulated
TWIST1	Twist1	EMT-TF	3.87	8.42	4.55	23.43	H1299 upregulated
TWIST2	Twist2	EMT-TF	1.23	2.34	1.11	2.16	H1299 upregulated
ZEB1	ZEB1	EMT-TF	2.45	5.67	3.22	9.32	H1299 upregulated
ZEB2	ZEB2	EMT-TF	1.89	4.23	2.34	5.06	H1299 upregulated
FN1	Fibronectin	Matrix	8.34	9.12	0.78	1.72	Similar
OCLN	Occludin	Epithelial	3.12	1.45	-1.67	0.31	H1299 loss (mesenchymal)
CTNNB1	β-catenin	Epithelial	6.78	5.89	-0.89	0.54	Similar
MMP2	MMP2	Matrix	4.56	6.78	2.22	4.66	H1299 gain (mesenchymal)
EPCAM	EpCAM	Epithelial	5.67	2.34	-3.33	0.1	H1299 loss (mesenchymal)
VIM/CDH1 Ratio	Canonical EMT metric	Ratio	98.3	1438.1	3.87	14.63	H1299 mesenchymal

## Sheet: Data Legend
Information	Details
Data Source	Cancer Dependency Map (DepMap)
Database Version	Public 24Q2 Release
Number of Cell Lines	1,699
A549 DepMap ID	ACH-000681
H1299 DepMap ID	ACH-000510
Expression Units	log₂(TPM + 1), where TPM = Transcripts Per Million
VIM/CDH1 Calculation	VIM/CDH1 = 2^(VIM_expr - CDH1_expr)
Reference	Ghandi et al. (2019) Nature
