# Supplementary material for: A statistically rigorous multi-scale texture analysis framework for 3D spheroid characterization: temporal autocorrelation correction and molecular validation
Source: Sci Rep. 2026 May 9;16:21252. doi: 10.1038/s41598-026-51722-5 (PMC13347032; doi:10.1038/s41598-026-51722-5)
Supplement: Supplementary file 3 — Supplementary Material 3 [file 41598_2026_51722_MOESM3_ESM.xlsx]

## Sheet: Feature Definitions
Feature ID	Feature Family	Feature Name	Mathematical Definition	Mathematical Equation	Parameters	Spatial Scale	Biological Interpretation
1	GLCM	contrast_0deg	GLCM contrast at θ=0°, distance=2 pixels	Contrast = Σ(i,j) P(i,j) × (i-j)²	distance=2 px (2.64 μm), gray levels=16, normalization=symmetric	2.64 μm (local cellular scale)	Local intensity variation; high in heterogeneous regions
2	GLCM	contrast_135deg	GLCM contrast at θ=135°, distance=2 pixels	Contrast = Σ(i,j) P(i,j) × (i-j)²	distance=2 px (2.64 μm), gray levels=16, normalization=symmetric	2.64 μm (local cellular scale)	Local intensity variation; high in heterogeneous regions
3	GLCM	contrast_45deg	GLCM contrast at θ=45°, distance=2 pixels	Contrast = Σ(i,j) P(i,j) × (i-j)²	distance=2 px (2.64 μm), gray levels=16, normalization=symmetric	2.64 μm (local cellular scale)	Local intensity variation; high in heterogeneous regions
4	GLCM	contrast_90deg	GLCM contrast at θ=90°, distance=2 pixels	Contrast = Σ(i,j) P(i,j) × (i-j)²	distance=2 px (2.64 μm), gray levels=16, normalization=symmetric	2.64 μm (local cellular scale)	Local intensity variation; high in heterogeneous regions
5	GLCM	correlation_0deg	GLCM correlation at θ=0°, distance=2 pixels	Correlation = Σ(i,j) [(i-μᵢ)(j-μⱼ)P(i,j)] / (σᵢσⱼ)	distance=2 px (2.64 μm), gray levels=16, normalization=symmetric	2.64 μm (local cellular scale)	Linear gray-level dependencies; texture predictability
6	GLCM	correlation_135deg	GLCM correlation at θ=135°, distance=2 pixels	Correlation = Σ(i,j) [(i-μᵢ)(j-μⱼ)P(i,j)] / (σᵢσⱼ)	distance=2 px (2.64 μm), gray levels=16, normalization=symmetric	2.64 μm (local cellular scale)	Linear gray-level dependencies; texture predictability
7	GLCM	correlation_45deg	GLCM correlation at θ=45°, distance=2 pixels	Correlation = Σ(i,j) [(i-μᵢ)(j-μⱼ)P(i,j)] / (σᵢσⱼ)	distance=2 px (2.64 μm), gray levels=16, normalization=symmetric	2.64 μm (local cellular scale)	Linear gray-level dependencies; texture predictability
8	GLCM	correlation_90deg	GLCM correlation at θ=90°, distance=2 pixels	Correlation = Σ(i,j) [(i-μᵢ)(j-μⱼ)P(i,j)] / (σᵢσⱼ)	distance=2 px (2.64 μm), gray levels=16, normalization=symmetric	2.64 μm (local cellular scale)	Linear gray-level dependencies; texture predictability
9	GLCM	dissimilarity_0deg	GLCM dissimilarity at θ=0°, distance=2 pixels	Dissimilarity = Σ(i,j) P(i,j) × |i-j|	distance=2 px (2.64 μm), gray levels=16, normalization=symmetric	2.64 μm (local cellular scale)	Linear contrast; similar to contrast but less weighted
10	GLCM	dissimilarity_135deg	GLCM dissimilarity at θ=135°, distance=2 pixels	Dissimilarity = Σ(i,j) P(i,j) × |i-j|	distance=2 px (2.64 μm), gray levels=16, normalization=symmetric	2.64 μm (local cellular scale)	Linear contrast; similar to contrast but less weighted
11	GLCM	dissimilarity_45deg	GLCM dissimilarity at θ=45°, distance=2 pixels	Dissimilarity = Σ(i,j) P(i,j) × |i-j|	distance=2 px (2.64 μm), gray levels=16, normalization=symmetric	2.64 μm (local cellular scale)	Linear contrast; similar to contrast but less weighted
12	GLCM	dissimilarity_90deg	GLCM dissimilarity at θ=90°, distance=2 pixels	Dissimilarity = Σ(i,j) P(i,j) × |i-j|	distance=2 px (2.64 μm), gray levels=16, normalization=symmetric	2.64 μm (local cellular scale)	Linear contrast; similar to contrast but less weighted
13	GLCM	energy_0deg	GLCM energy at θ=0°, distance=2 pixels	Energy = Σ(i,j) P(i,j)²	distance=2 px (2.64 μm), gray levels=16, normalization=symmetric	2.64 μm (local cellular scale)	Texture uniformity; high in homogeneous regions
14	GLCM	energy_135deg	GLCM energy at θ=135°, distance=2 pixels	Energy = Σ(i,j) P(i,j)²	distance=2 px (2.64 μm), gray levels=16, normalization=symmetric	2.64 μm (local cellular scale)	Texture uniformity; high in homogeneous regions
15	GLCM	energy_45deg	GLCM energy at θ=45°, distance=2 pixels	Energy = Σ(i,j) P(i,j)²	distance=2 px (2.64 μm), gray levels=16, normalization=symmetric	2.64 μm (local cellular scale)	Texture uniformity; high in homogeneous regions
16	GLCM	energy_90deg	GLCM energy at θ=90°, distance=2 pixels	Energy = Σ(i,j) P(i,j)²	distance=2 px (2.64 μm), gray levels=16, normalization=symmetric	2.64 μm (local cellular scale)	Texture uniformity; high in homogeneous regions
17	GLCM	entropy_0deg	GLCM entropy at θ=0°, distance=2 pixels	Entropy = -Σ(i,j) P(i,j) × log[P(i,j)]	distance=2 px (2.64 μm), gray levels=16, normalization=symmetric	2.64 μm (local cellular scale)	Texture randomness; high in complex/disordered regions
18	GLCM	entropy_135deg	GLCM entropy at θ=135°, distance=2 pixels	Entropy = -Σ(i,j) P(i,j) × log[P(i,j)]	distance=2 px (2.64 μm), gray levels=16, normalization=symmetric	2.64 μm (local cellular scale)	Texture randomness; high in complex/disordered regions
19	GLCM	entropy_45deg	GLCM entropy at θ=45°, distance=2 pixels	Entropy = -Σ(i,j) P(i,j) × log[P(i,j)]	distance=2 px (2.64 μm), gray levels=16, normalization=symmetric	2.64 μm (local cellular scale)	Texture randomness; high in complex/disordered regions
20	GLCM	entropy_90deg	GLCM entropy at θ=90°, distance=2 pixels	Entropy = -Σ(i,j) P(i,j) × log[P(i,j)]	distance=2 px (2.64 μm), gray levels=16, normalization=symmetric	2.64 μm (local cellular scale)	Texture randomness; high in complex/disordered regions
21	GLCM	homogeneity_0deg	GLCM homogeneity at θ=0°, distance=2 pixels	Homogeneity = Σ(i,j) P(i,j) / [1 + (i-j)²]	distance=2 px (2.64 μm), gray levels=16, normalization=symmetric	2.64 μm (local cellular scale)	Closeness of distribution to diagonal; smooth textures
22	GLCM	homogeneity_135deg	GLCM homogeneity at θ=135°, distance=2 pixels	Homogeneity = Σ(i,j) P(i,j) / [1 + (i-j)²]	distance=2 px (2.64 μm), gray levels=16, normalization=symmetric	2.64 μm (local cellular scale)	Closeness of distribution to diagonal; smooth textures
23	GLCM	homogeneity_45deg	GLCM homogeneity at θ=45°, distance=2 pixels	Homogeneity = Σ(i,j) P(i,j) / [1 + (i-j)²]	distance=2 px (2.64 μm), gray levels=16, normalization=symmetric	2.64 μm (local cellular scale)	Closeness of distribution to diagonal; smooth textures
24	GLCM	homogeneity_90deg	GLCM homogeneity at θ=90°, distance=2 pixels	Homogeneity = Σ(i,j) P(i,j) / [1 + (i-j)²]	distance=2 px (2.64 μm), gray levels=16, normalization=symmetric	2.64 μm (local cellular scale)	Closeness of distribution to diagonal; smooth textures
25	Gabor	gabor_dominant_orientation	Orientation angle with maximum mean Gabor response	θ_dominant = argmax_θ mean[|G(θ)|]	frequencies=[0.05, 0.1, 0.2] cycles/px, orientations=[0°, 45°, 90°, 135°], σ=2.0	Orientation-dependent (0-180°)	Preferred directional structure in spheroid texture
26	Gabor	gabor_f0.05_max	Maximum Gabor magnitude response at f=0.05 cycles/pixel	|G| = √(real² + imag²)	frequencies=[0.05, 0.1, 0.2] cycles/px, orientations=[0°, 45°, 90°, 135°], σ=2.0	~26 μm (λ=20 pixels @ 1.32 μm/px)	Coarse texture patterns (multi-cell cluster scale)
27	Gabor	gabor_f0.1_max	Maximum Gabor magnitude response at f=0.1 cycles/pixel	|G| = √(real² + imag²)	frequencies=[0.05, 0.1, 0.2] cycles/px, orientations=[0°, 45°, 90°, 135°], σ=2.0	~13 μm (λ=10 pixels @ 1.32 μm/px)	Medium texture patterns (single-cell scale)
28	Gabor	gabor_f0.2_max	Maximum Gabor magnitude response at f=0.2 cycles/pixel	|G| = √(real² + imag²)	frequencies=[0.05, 0.1, 0.2] cycles/px, orientations=[0°, 45°, 90°, 135°], σ=2.0	~7 μm (λ=5 pixels @ 1.32 μm/px)	Fine texture patterns (subcellular scale)
29	Gabor	gabor_orientation_variance	Variance of Gabor responses across 4 orientations	Var_orient = Var[|G(θ₀°)|, |G(θ₄₅°)|, |G(θ₉₀°)|, |G(θ₁₃₅°)|]	frequencies=[0.05, 0.1, 0.2] cycles/px, orientations=[0°, 45°, 90°, 135°], σ=2.0	Multi-scale (aggregates all frequencies)	Texture anisotropy; high = directional, low = isotropic
30	Gabor	gabor_response_ratio	Ratio: max(f=0.2) / max(f=0.05) Gabor responses	Ratio = max[|G(f=0.2)|] / max[|G(f=0.05)|]	frequencies=[0.05, 0.1, 0.2] cycles/px, orientations=[0°, 45°, 90°, 135°], σ=2.0	7-26 μm ratio (subcellular to multi-cell)	Fine-to-coarse texture balance; texture complexity
31	Wavelet	approximation_energy	Daubechies-4 approximation coefficients energy, level 2	E_approx = Σ(cA2)² / N	wavelet=db4 (Daubechies-4), decomposition levels=2	>50 μm (global spheroid structure)	Low-frequency spheroid structure; overall shape/size
32	Wavelet	detail_d1_variance	Daubechies-4 diagonal detail variance, level 1	Var_detail = Σ(cD - mean[cD])² / (N-1)	wavelet=db4 (Daubechies-4), decomposition levels=2	5-25 μm (fine cellular)	Diagonal edge content at 5-25 μm (fine cellular) scale
33	Wavelet	detail_d2_variance	Daubechies-4 diagonal detail variance, level 2	Var_detail = Σ(cD - mean[cD])² / (N-1)	wavelet=db4 (Daubechies-4), decomposition levels=2	25-50 μm (multi-cellular)	Diagonal edge content at 25-50 μm (multi-cellular) scale
34	Wavelet	detail_h1_variance	Daubechies-4 horizontal detail variance, level 1	Var_detail = Σ(cD - mean[cD])² / (N-1)	wavelet=db4 (Daubechies-4), decomposition levels=2	5-25 μm (fine cellular)	Horizontal edge content at 5-25 μm (fine cellular) scale
35	Wavelet	detail_h2_variance	Daubechies-4 horizontal detail variance, level 2	Var_detail = Σ(cD - mean[cD])² / (N-1)	wavelet=db4 (Daubechies-4), decomposition levels=2	25-50 μm (multi-cellular)	Horizontal edge content at 25-50 μm (multi-cellular) scale
36	Wavelet	detail_v1_variance	Daubechies-4 vertical detail variance, level 1	Var_detail = Σ(cD - mean[cD])² / (N-1)	wavelet=db4 (Daubechies-4), decomposition levels=2	5-25 μm (fine cellular)	Vertical edge content at 5-25 μm (fine cellular) scale
37	Wavelet	detail_v2_variance	Daubechies-4 vertical detail variance, level 2	Var_detail = Σ(cD - mean[cD])² / (N-1)	wavelet=db4 (Daubechies-4), decomposition levels=2	25-50 μm (multi-cellular)	Vertical edge content at 25-50 μm (multi-cellular) scale

## Sheet: Symbol Glossary
Symbol	Meaning
Σ	Summation (sum over all i,j)
×	Multiplication
²	Squared (power of 2)
μ	Mean (mu)
σ	Standard deviation (sigma)
θ	Orientation angle (theta)
π	Pi (3.14159...)
√	Square root
±	Plus or minus
λ	Wavelength (lambda)
P(i,j)	Co-occurrence probability of intensity pair (i,j)
cA	Approximation coefficients (low-frequency)
cD	Detail coefficients (high-frequency)
φ(x)	Scaling function (father wavelet)
ψ(x)	Wavelet function (mother wavelet)
|G|	Gabor magnitude response (phase-invariant)

## Sheet: Methods Summary
Method	Number of Features	Primary Reference	Implementation
GLCM	24	Haralick et al. (1973) IEEE Trans SMC	scikit-image 0.24.0: skimage.feature.graycomatrix
Wavelet	7	Mallat (1989) IEEE Trans PAMI	PyWavelets 1.4.1: pywt.wavedec2
Gabor	6	Jain & Farrokhnia (1991) Pattern Recognit	scikit-image 0.24.0: skimage.filters.gabor
TOTAL	37	-	-
